# Supplementary material for: Association of circulating proteasome activity with Alzheimer’s pathology and cognitive functions in APOE ε4 carriers
Source: Research Square preprint supplement (doi:10.21203/rs.3.rs-8306028/v1), 2025-12-15
Supplement: Supplementary file 1 [file c70441d38cf52dca24c9c2a0.docx]

**Supplementary Materials**

**Supplementary Text 1. Detailed neuropsychological tests**

Neuropsychological testing was performed using the Seoul Neuropsychological Screening Battery (SNSB)-II [1]. This battery contains assessments of attention (forward and backward Digit Span Test [DST]), language function　(Korean-Boston Naming Test [K-BNT]), praxis (Ideomotor, Buccofacial), the four symptoms testing of Gerstmann syndrome (Writing, Finger naming, Right-left orientation and calculation), visuospatial function (Rey Complex Figure Test [RCFT]-copy), verbal memory (Seoul Verbal Learning Test-Elderly’s version [SVLT-E] immediate, 20-min delayed recall and recognition), visual memory (RCFT immediate, 20-min delayed recall and recognition), and frontal/executive functions (semantic and phonemic Controlled Oral Word Association Test [COWAT]; Korean-Color Word Stroop Test [K-CWST]; Korean-Trail Making Test-Elderly’s version [K-TMT-E]) [2].

**Supplementary Text 2. Assessment of WMHV, lacunes and cerebral microbleeds**

***Assessment of WMHV***

We used FLAIR images to quantify white matter hyperintensity (WMH) volume through fully automated segmentation of WMH, as described previously [3]. The method consists of five stages, (1) initial preprocessing; (2) WMH candidate region mask; (3) segmentation of WMH; (4) T1 intensity substitution; and (5) local quantification of segmented WMH [3].

***Assessment of Lacunes and Cerebral microbleeds***

All structural imaging markers of CSVD were rated in accordance with consensus guidelines. Lacunes were identified and counted in accordance with 2013 STRIVE guideline (STandards for ReportIng Vascular changes on nEuroimaging) [4]. Lacunes were defined as lesions of ≥ 3 mm and ≤ 15 mm in diameter with low signal on T1-MPRAGE images, high signal on T2-weighted images, and low signal with a perilesional halo on 72 axial sections of FLAIR images. Cerebral microbleeds (CMB) were defined as small lesions of ≤10 mm in diameter, using criteria proposed by Greenberg et al. [5], lobar CMBs were defined as homogenous and round lesions with low signal (≤ 10 mm in diameter) on SWI images and high signal on phase images, with location in exclusively lobar (cortex, gray-white matter junction, subcortical white matter) areas.

**References**

1. Kang, Y., S. Jahng, and D.L. Na, *In: Seoul Neuropsychological Screening Battery, 2nd Edition (SNSB-II)*. 2012, Seoul: Human Brain Research & Consulting Co.

2. Ahn, H.J., et al., *Seoul Neuropsychological Screening Battery-dementia version (SNSB-D): a useful tool for assessing and monitoring cognitive impairments in dementia patients.* J Korean Med Sci, 2010. **25**(7): p. 1071–6.

3. Jeon, S., et al., *Fully Automated Pipeline for Quantification and Localization of White Matter Hyperintensity in Brain Magnetic Resonance Image.* International Journal of Imaging Systems and Technology, 2011. **21**(2): p. 193–200.

4. Wardlaw, J.M., et al., *Neuroimaging standards for research into small vessel disease and its contribution to ageing and neurodegeneration.* Lancet Neurology, 2013. **12**(8): p. 822–838.

5. Greenberg, S.M., et al., *Microbleeds Versus Macrobleeds Evidence for Distinct Entities.* Stroke, 2009. **40**(7): p. 2382–2386.

**Supplementary Table 1. Demographics and APOE genotypes of the Diagnostic groups**

| **Variables (N = 148)** | | **CN** | **MCI** | **ADD** | **OD** | *p* value |
| --- | --- | --- | --- | --- | --- | --- |
| **n** | | 58 | 39 | 38 | 13 |  |
| **Age** | | 70.07±5.03 | 73.31±7.63 | 69.55±10.58 | 70.15±10.40 | 0.150 |
| **Sex (Female, n [%])** | | 43(74.1) | 26(66.7) | 19(50.0) | 9(69.2) | 0.114 |
| **Education(year)** | | 9.33±3.65 | 8.23±4.84 | 9.76±3.87 | 8.69±5.76 | 0.419 |
| **APOE genotype** |  |  |  |  |  | 0.034† |
|  | ε2/ε3 | 9(15.5) | 4(10.3) | 2(5.3) | 2(15.4) |  |
|  | ε3/ε3 | 34(58.6) | 17(43.6) | 15(39.5) | 10(76.9) |
|  | ε2/ε4 | 1(1.7) | 0(0.0) | 2(5.3) | 0(0.0) |
|  | ε3/ε4 | 13(22.4) | 12(30.8) | 13(34.2) | 1(7.7) |
|  | ε4/ε4 | 1(1.7) | 6(15.4) | 6(15.8) | 0(0.0) |
| Values are presented as mean ± standard deviation for continuous variables and as number (%) for nominal variables. Group comparisons were performed between the diagnosis groups using analysis of variance for continuous variables with post hoc Bonferroni test and chi-square test for categorical variables. All group comparisons were non-significant at p < 0.05, except for †, which was assessed using Fisher’s exact test. | | | | | | | |

**Supplementary Table 2. Associated of amyloid, tau and neurodegeneration markers and proteasome activity in all participants**

| **Variables** | **All participants** | |
| --- | --- | --- |
|  | β (SE) | *p* value |
| **Cortical FLUTE SUVR** | -0.069(0.040) | 0.085 |
| **Global MK-6240 SUVR** | -0.144(0.132) | 0.279 |
| **Regional MK-6240 SUVR in Braak I/II** | -0.138(0.118) | 0.245 |
| **Regional MK-6240 SUVR in Braak III/IV** | -0.155(0.116) | 0.182 |
| **Regional MK-6240 SUVR in Braak V/VI** | -0.108(0.115) | 0.349 |
| **Mean cortical thickness** | 0.027(0.026) | 0.304 |
| **HV/ICV** | 0.026(0.060) | 0.665 |
| Values were expressed as beta coefficients and standard errors, from multivariable linear regression models adjusted for age, sex, and years of education. *Abbreviations*. FLUTE, flutemetamol; SUVR, standardized uptake value ratio; HV. Hippocampal volume; ICV, intracranial volume. | | |

**Supplementary Table 3. Association of cognitive functions and proteasome activity in all participants**

| **Variables** | **All participants** | |
| --- | --- | --- |
|  | β (SE) | *p* value |
| **MMSE** | 0.149(0.739) | 0.841 |
| **CDR-SOB** | -0.194(0.422) | 0.647 |
| **Digit span test: forward** | 0.086(0.147) | 0.560 |
| **Digit span test: backward** | 0.020(0.152) | 0.896 |
| **Boston Naming Test** | 0.130(0.252) | 0.608 |
| **Rey Complex Figure Test-copy** | 0.154(0.470) | 0.744 |
| **SVLT immediate recall** | 0.339(0.225) | 0.133 |
| **SVLT delayed recall** | 0.338(0.233) | 0.149 |
| **SVLT recognition** | 0.296(0.277) | 0.287 |
| **RCFT immediate recall** | 0.151(0.186) | 0.419 |
| **RCFT delayed recall** | 0.169(0.192) | 0.378 |
| **RCFT recognition** | 0.223(0.216) | 0.305 |
| **COWAT animal** | 0.180(0.172) | 0.297 |
| **COWAT supermarket** | 0.064(0.183) | 0.724 |
| **COWAT phonemic total** | 0.059(0.166) | 0.723 |
| **Stroop test - color reading** | 0.286(0.203) | 0.161 |
| **Digit Symbol Coding** | 0.341(0.229) | 0.139 |
| **TMT-A** | -0.037(1.047) | 0.972 |
| **TMT-B** | 0.200(0.684) | 0.771 |
| Values were expressed as beta coefficients and standard errors, from multivariable linear regression models adjusted for age, sex, and years of education.  Abbreviations, MMSE, Mini-Mental State Examination; CDR-SOB, Clinical Dementia Rating-Sum of Boxes; SVLT, Seoul verbal language test; RCFT, Rey complex figure test; COWAT, Controlled Oral word association test; TMT, Trail making test | | |

**Supplementary Table 4. Mediating effects of amyloid and tau burden on associations between proteasome activity and cognitive function and Hippocampus volume**

| **Mediator** | **Measures** | **Indirect effect** | ***p*-value** | **Direct effect** | ***p*-value** | **Total effect** | ***p*-value** | **Proportion Mediated** | ***p*-value** |
| --- | --- | --- | --- | --- | --- | --- | --- | --- | --- |
| **Cortical-FLUTE** | **MMSE** | 0.78 [-0.06, 1.76] | 0.070 | 1.56 [-0.56, 3.51] | 0.124 | 2.34 [0.31, 4] | 0.038 | 0.33 [-0.07, 1.26] | 0.104 |
|  | **CDR-SOB** | -0.33 [-0.83, 0.12] | 0.066 | -1.27 [-2.78, -0.05] | 0.038 | -1.6 [-2.78, -0.49] | 0.010 | 0.21 [-0.07, 0.84] | 0.134 |
|  | **HV/ICV** | 0.09 [0.01, 0.19] | 0.020 | 0.21 [0.01, 0.37] | 0.046 | 0.29 [0.08, 0.46] | 0.018 | 0.29 [0.03, 0.82] | 0.030 |
| **Global MK-6240** | **MMSE** | 1.02 [-0.07, 2.24] | 0.070 | 1.7 [-0.1, 3.16] | 0.060 | 2.72 [0.64, 4.34] | 0.014 | 0.38 [-0.07, 1.01] | 0.068 |
|  | **CDR-SOB** | -0.45 [-1.07, 0.02] | 0.124 | -1.24 [-2.45, -0.07] | 0.032 | -1.69 [-2.98, -0.59] | 0.002 | 0.27 [-0.02, 0.91] | 0.068 |
|  | **HV/ICV** | 0.05 [-0.01, 0.18] | 0.128 | 0.27 [0.03, 0.43] | 0.020 | 0.32 [0.09, 0.49] | 0.008 | 0.14 [-0.03, 0.65] | 0.132 |
| **Braak I/II** | **MMSE** | 0.75 [0.07, 1.56] | 0.036 | 1.97 [0.12, 3.57] | 0.042 | 2.72 [0.64, 4.34] | 0.014 | 0.28 [0.02, 0.79] | 0.034 |
|  | **CDR-SOB** | -0.41 [-0.83, -0.05] | 0.032 | -1.28 [-2.57, -0.18] | 0.016 | -1.69 [-2.98, -0.59] | 0.002 | 0.24 [0.04, 0.77] | 0.030 |
|  | **HV/ICV** | 0.07 [0.01, 0.15] | 0.032 | 0.24 [0.05, 0.41] | 0.014 | 0.32 [0.09, 0.49] | 0.008 | 0.23 [0.02, 0.56] | 0.088 |
| **Braak III/IV** | **MMSE** | 1.12 [0.19, 2.16] | 0.028 | 1.6 [-0.11, 3.12] | 0.070 | 2.72 [0.64, 4.34] | 0.014 | 0.41 [0.1, 1.01] | 0.042 |
|  | **CDR-SOB** | -0.51 [-1.04, -0.08] | 0.028 | -1.18 [-2.44, -0.02] | 0.048 | -1.69 [-2.98, -0.59] | 0.002 | 0.3 [0.05, 0.96] | 0.030 |
|  | **HV/ICV** | 0.05 [0, 0.15] | 0.084 | 0.27 [0.04, 0.43] | 0.014 | 0.32 [0.09, 0.49] | 0.008 | 0.15 [-0.02, 0.57] | 0.040 |

Abbreviations, MMSE, Mini-Mental State Examination; CDR-SOB, Clinical Dementia Rating-Sum of Boxes; HV. Hippocampal volume; ICV, intracranial volume.
